# Supplementary material for: Tailor-made peptide sensor for detection of matrix metalloproteinase 2 in blood serum
Source: Royal Society of Chemistry journal article supplement (doi:10.1039/c5ay00666j), 2015-01-01
Supplement: c5ay00666j1.pdf [file c5ay00666j1.pdf]

## Supporting Information

### 2 Experimental Section

3 **Chemicals.** Peptides (SH-PEG-CALNNGPLGVGRGAK-N<sub>2</sub>H) were synthesized by  
4 GL Biochem (Shanghai). MMP-2 was purchased from Sino Biological Inc. Co., Ltd..  
5 4-aminophenylmercuric acetate (APMA) was purchased from Shanghai Genmed  
6 Gene Pharmaceutical Technology. Co., Ltd.. 6-mercaptohexano (MCH), N-(3-  
7 dimethylaminopropyl)-N'-ethylcarbodiimide (EDC) and N-Hydroxysuccinimide  
8 (NHS) were received from Shanghai Medpep Co., Ltd. All other chemicals were of  
9 analytical grade.

10 All solutions were prepared with using Milli-Q reagent water (Milli-Q, Millipore,  
11 18.2-MΩ resistivity). Peptide buffer solution was prepared by dissolving 4.5 mg  
12 peptide into TCNB buffer (50 mM Tris-HCl with 10 mM CaCl<sub>2</sub>, 150 mM NaCl, and  
13 0.05% Brij 35; pH 7.5). Electrochemical buffer solution: (10 mM Tris-HCl with 10  
14 mM MgCl<sub>2</sub>, and 500 mM KCl, pH 7.4).

15 **The preparation of Fc-labeled peptide.** Fc-labeled peptide was prepared according  
16 to the previous reports. Firstly, 10 mg/mL of ferrocene acetic acid was added to the  
17 solution containing EDC/NHS (0.1 mol/L for each) for 3 h to activate the COOH  
18 group of ferrocene acetic acid. Next, 150 μL of activated ferrocene acetic acid  
19 mixture solution was incubated with 50 μL peptide solution at room temperature  
20 overnight. Then, the resulted solution was stored in refrigerator at 4 °C for the  
21 following experiments.

22 **The fabrication of peptide-modified electrode.** A gold electrode (2 mm in diameter,

1 CH Instruments, Shanghai, China) was immersed into freshly prepared piranha acid  
2 ( $V_{H_2SO_4}:V_{H_2O_2}=1:1$ ) for 1 h, and then polished with aqueous slurries of 1.0  $\mu\text{m}$ , 0.3 $\mu\text{m}$   
3 and 0.05 $\mu\text{m}$   $\alpha\text{-Al}_2\text{O}_3$  powders on a polishing microcloth and sonicated with deioned  
4 water, ethanol for 3 min, respectively. After rinsing with deioned water, the above  
5 electrode was electrochemically activated by consecutively cycling in the potential  
6 range of 0 ~ +1.6 V in 0.5 mol/L sulfuric acid until a cyclic voltammogram was  
7 achieved, which means that a clean gold electrode was obtained. This treated  
8 electrode was then interacted with 10  $\mu\text{L}$  as-prepared Fc-labeled peptide solution for  
9 90 min to achieve a peptide-modified electrode.

10 **MMP-2 detection.** Firstly, MMP-2 solutions were prepared by dissolving MMP-2  
11 into TCNB buffer. Before the analysis, MMP-2 was activated with APMA according  
12 to the provided protocols by the manufacturer. Briefly, 20  $\mu\text{L}$  of MMP-2 at different  
13 concentrations were mixed with 2 mM APMA (final concentration) in 37  $^\circ\text{C}$  water  
14 bath for 1 h. And then the proposed peptide-modified electrode was immersed into the  
15 activated MMP-2 solution for 60 min at room temperature followed by the  
16 electrochemical measurement.

17 **Electrochemical measurement.** All electrochemical measurements were carried out  
18 using CHI 660D electrochemical system (CH Instruments, Shanghai, China) at room  
19 temperature. A three-electrode electrochemical cell was used. Above peptide-  
20 modified gold electrode was used as the working electrode. Platinum wire and  
21 Ag/AgCl (saturated with KCl) were used as counter and reference electrodes,  
22 respectively. Differential pulse voltammetry (DPV) was used as scan mode. The

1 parameter was set as follow: the potential interval from 0 to +0.4 V vs. Ag/AgCl,  
2 modulation amplitude 0.05V, pulse width 0.06 s, and sample width 0.02 s.

3 **Treatment of blood serum.** Blood sample was kept in EP tube for overnight at 4 °C.  
4 After centrifugation for 20 min at 4 °C, the clear supernatant layer was collected via  
5 0.45 µm milli-pore filter to obtain blood serum sample. The collected serum was  
6 diluted to certain volume using double distilled de-ionized water for the following  
7 experiment.

## 8 **Results and Discussion**

### 9 **Optimized condition.**

10 In order to achieve better assay results, some conditions are optimized.  
11 Immobilization time of peptides is an important factor for the performance of the  
12 sensor. As shown in Fig. S1A, upon increasing assembly time, more Fc-peptide is  
13 immobilized on the gole electrode, resultin in the DPV signal enhances. While the  
14 assembly time exceeds 60 min, DPV signal reaches a plateau due to the steric  
15 hindrance. Thus, 60 min is used as the assembly time of peptide for the following  
16 experiment. Additionally, the hydrolytic time of peptides is also investigated. The  
17 results are shown in Fig. S2B. It is found that DPV signal decreases sharply until the  
18 hydrolytic time approaches 90 min. Hence, 90 min is set as the optimal hydrolytic  
19 time.

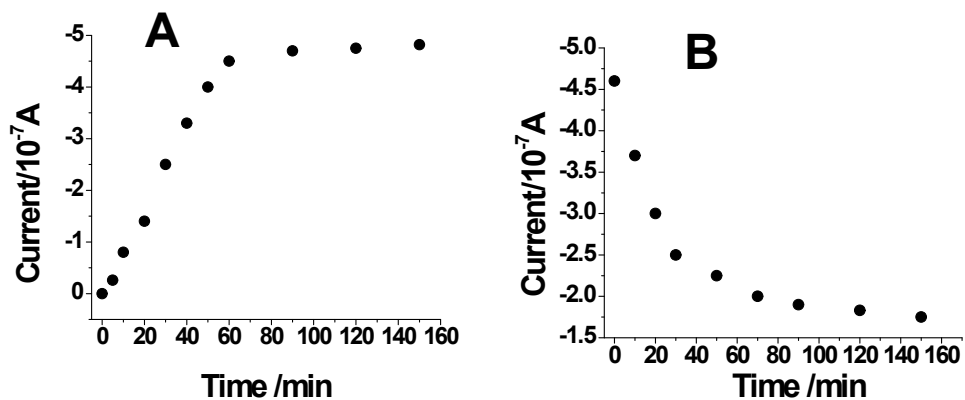

1

2 **Figure S1** A) Optimization of the measuring system. Influence of: (A) immobilized

3 time (B) incubation time.

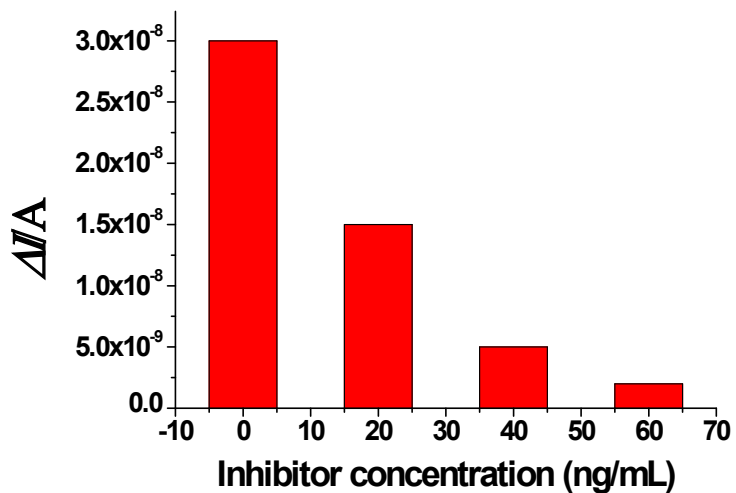

4

5 **Figure S2** Current response of the sensor upon the introduction of different

6 concentration of the inhibitor.

7
